# Supplementary material for: Cell Painting predicts impact of lung cancer variants
Source: PubMed Central journal article supplement — Mol Biol Cell. 2022 May 12;33(6):ar49. doi: 10.1091/mbc.E21-11-0538 (PMC9265158; doi:10.1091/mbc.e21-11-0538), 2022-05-12
Supplement: mbc-33-ar49-s001.pdf [file mbc-33-ar49-s001.pdf]

# Supplementary Materials

*Molecular Biology of the Cell*

Caicedo *et al.*

# Cell Painting predicts impact of lung cancer variants

Juan C. Caicedo, John Arevalo, Federica Piccioni, Mark-Anthony Bray, Cathy L. Hartland, Xiaoyun Wu, Angela N. Brooks, Alice H. Berger, Jesse S. Boehm, Anne E. Carpenter\*, Shantanu Singh\*

\* corresponding authors: shantanu@broadinstitute.org, anne@broadinstitute.org

## Supplementary material

All figures and data presented in this manuscript are available in an interactive format at <http://broad.io/cmvip>.

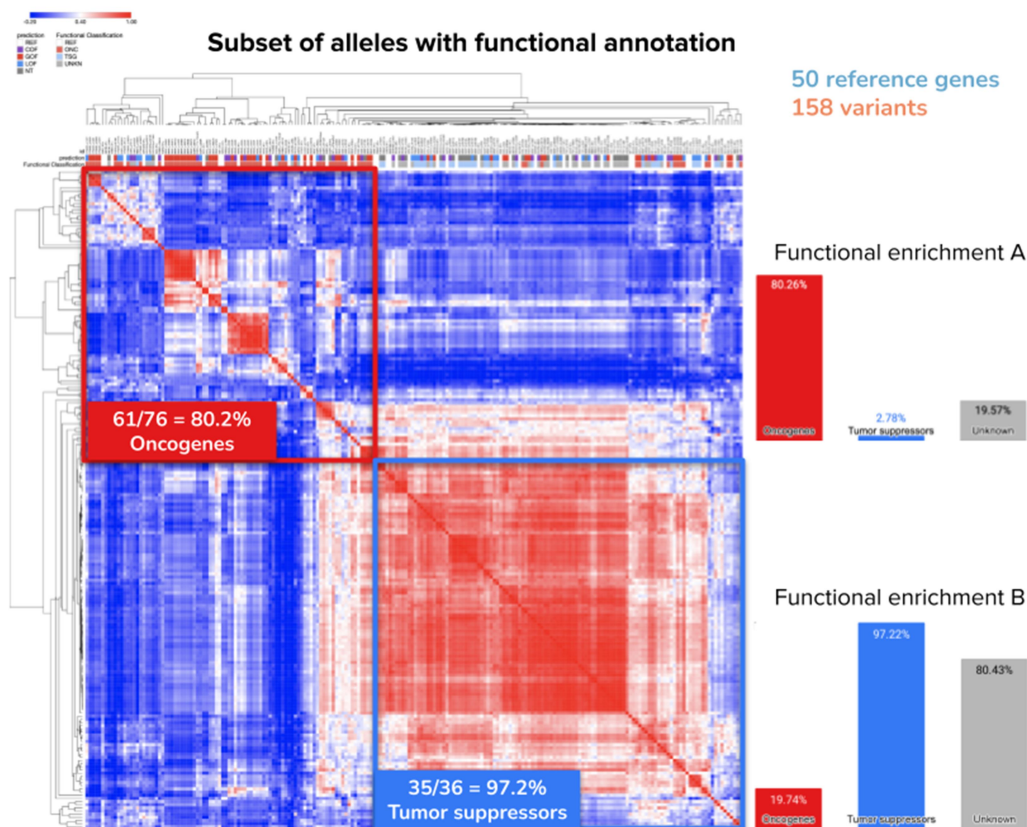

**Supplementary Figure 1.** Correlation matrix of Cell Painting profiles for a subset of alleles with functional annotation. After ordering rows and columns according to the hierarchical clustering, the matrix can be divided in two parts: one enriched with oncogenes and the second enriched with tumor suppressor genes. Enrichment here is defined as the proportion of alleles in one functional category that are present in the group with respect to all alleles of that category.

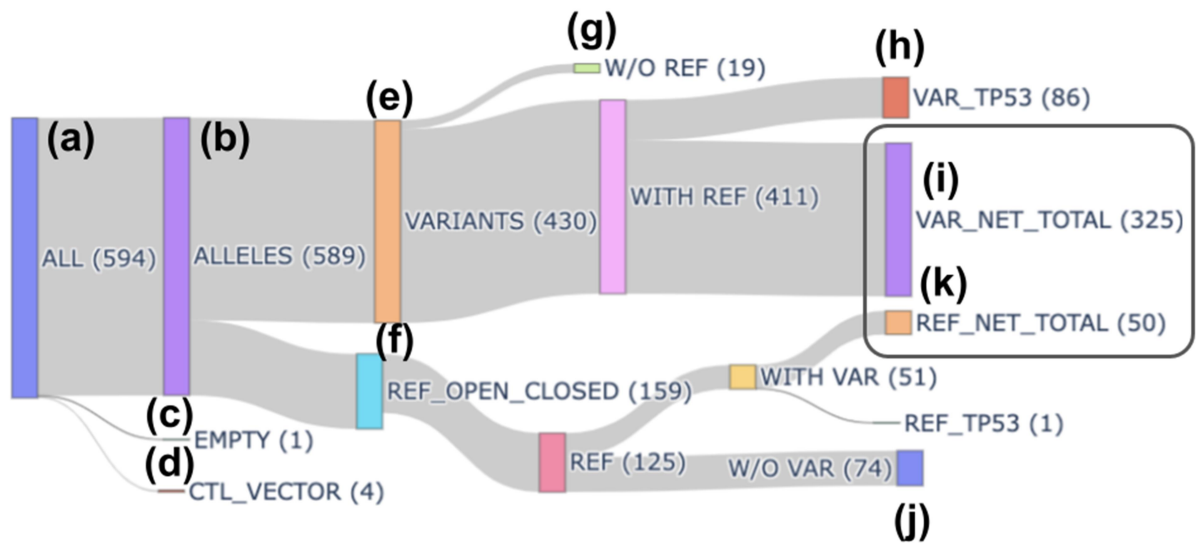

**Supplementary Figure 2.** Disaggregation of the metadata in the raw dataset. The *x\_mutation\_status* column tags the content of each assay. It contains 594 unique values (a), 589 (b) corresponds to alleles, EMPTY (c) corresponds to the control tag, and *ctl\_vectors* (d) are not considered in this analysis. Out of the 589, 430 (e) are VARIANTS and 159 (f) are REFERENCE alleles. We discarded 19 variants (g) without reference, and 86 TP53 Variants (h) resulting in the 325 alleles(i). We also discarded 74 references that do not match with any variant (j), ending up with 50 (k) REFERENCE alleles. The enclosed subset represents the data used in this study.

### Classification of 20 benchmark alleles

| Allele             | Reference               | L1000 | CellP | Prior annotation | Allele        | Reference              | L1000 | CellP | Prior annotation |
|--------------------|-------------------------|-------|-------|------------------|---------------|------------------------|-------|-------|------------------|
| ARAF_p.S214F       | Imielinski et al., 2014 | COF   | LOF   | GOF              | KRAS_p.G13V   | Prior et al., 2012     | GOF   | COF   | GOF              |
| ARAF_p.S214C       | Imielinski et al., 2014 | COF   | COF   | GOF              | KRAS_p.G12R   | Prior et al., 2012     | GOF   | GOF   | GOF              |
| ARAF_p.D429A       | Imielinski et al., 2014 | GOF   | COF   | LOF              | KRAS_p.G12S   | Prior et al., 2012     | GOF   | GOF   | GOF              |
| CTNNB1_p.S37C      | Palacios et al., 1998   | GOF   | GOF   | GOF              | KRAS_p.G12D   | Prior et al., 2012     | GOF   | COF   | GOF              |
| EGFR_p.ELREA746del | Greulich et al., 2005   | COF   | COF   | GOF              | KRAS_p.G12F   | Prior et al., 2012     | GOF   | GOF   | GOF              |
| EGFR_p.L858R       | Greulich et al., 2005   | NT    | LOF   | GOF              | NRAS_p.Q61L   | Prior et al., 2012     | COF   | GOF   | GOF              |
| KEAP1_p.G333C      | Hast et al., 2014       | LOF   | LOF   | LOF              | RIT1_p.F82L   | Berger et al., 2014    | COF   | COF   | GOF              |
| KRAS_p.G12Y        | Prior et al., 2012      | COF   | GOF   | GOF              | RIT1_p.R122L  | Berger et al., 2014    | GOF   | LOF   | GOF              |
| KRAS_p.G12A        | Prior et al., 2012      | GOF   | GOF   | GOF              | STK11_p.G242W | Olschwang et al., 2001 | LOF   | LOF   | LOF              |
| KRAS_p.G12C        | Prior et al., 2012      | GOF   | GOF   | GOF              | STK11_p.D194Y | Engel et al., 2014     | LOF   | LOF   | LOF              |

**Supplementary Table 1.** Benchmark classification.

**False Positives Rate on mock REF vs VAR pairs**

| <b>Control Allele</b>   | <b>FPR</b>   |
|-------------------------|--------------|
| EGFR_WT.c               | 7.70%        |
| EGFR_p.L858R            | 7.80%        |
| EGFR_p.T790M, p.L858R.o | 8.00%        |
| KEAP1_WT.c              | 6.60%        |
| KRAS_p.G12V             | 7.10%        |
| MDM2_WT.c               | 5.40%        |
| NFE2L2_WT.c             | 7.60%        |
| STK11_WT.c              | 7.90%        |
| EMPTY                   | 2.70%        |
| <b>Average</b>          | <b>6.75%</b> |

**Supplementary Table 2.** Results of the false-positive analysis with mock alleles.
